# Supplementary material
Source: publisher figshare collection journal article supplement (https://acs.figshare.com/ndownloader/files/4034503)
Supplement: Supplementary file 1 [file 4034503]

 
data_mo_fax123_0m 
 
_audit_creation_method            SHELXL-97 
_chemical_name_systematic 
; 
 ? 
; 
_chemical_name_common             ? 
_chemical_melting_point           ? 
_chemical_formula_moiety          'C17 H25 N O3, H2 O'  
_chemical_formula_sum 
 'C17 H27 N O4' 
_chemical_formula_weight          309.40 
_chemical_absolute_configuration  unk
 
loop_ 
 _atom_type_symbol 
 _atom_type_description 
 _atom_type_scat_dispersion_real 
 _atom_type_scat_dispersion_imag 
 _atom_type_scat_source 
 'C'  'C'   0.0033   0.0016 
 'International Tables Vol C Tables 4.2.6.8 and 6.1.1.4' 
 'H'  'H'   0.0000   0.0000 
 'International Tables Vol C Tables 4.2.6.8 and 6.1.1.4' 
 'N'  'N'   0.0061   0.0033 
 'International Tables Vol C Tables 4.2.6.8 and 6.1.1.4' 
 'O'  'O'   0.0106   0.0060 
 'International Tables Vol C Tables 4.2.6.8 and 6.1.1.4' 
 
_symmetry_cell_setting           'Orthorhombic'
_symmetry_space_group_name_H-M   'P 21 21 21'
_symmetry_space_group_name_Hall  'P 2ac 2ab'
 
loop_ 
 _symmetry_equiv_pos_as_xyz 
 'x, y, z' 
 'x+1/2, -y+1/2, -z' 
 '-x, y+1/2, -z+1/2' 
 '-x+1/2, -y, z+1/2' 
 
_cell_length_a                    7.8362(6) 
_cell_length_b                    10.7459(8) 
_cell_length_c                    18.6308(13) 
_cell_angle_alpha                 90.00 
_cell_angle_beta                  90.00 
_cell_angle_gamma                 90.00 
_cell_volume                      1568.8(2) 
_cell_formula_units_Z             4 
_cell_measurement_temperature     100(2) 
_cell_measurement_reflns_used     9973
_cell_measurement_theta_min       2.82
_cell_measurement_theta_max       30.02

_exptl_crystal_description       'rhombus'
_exptl_crystal_colour            'colourless'
_exptl_crystal_size_max           0.42 
_exptl_crystal_size_mid           0.28 
_exptl_crystal_size_min           0.18 
_exptl_crystal_density_meas       ? 
_exptl_crystal_density_diffrn     1.310 
_exptl_crystal_density_method     'not measured' 
_exptl_crystal_F_000              672 
_exptl_absorpt_coefficient_mu     0.092 
_exptl_absorpt_correction_type    'multi-scan' 
_exptl_absorpt_correction_T_min   0.9623 
_exptl_absorpt_correction_T_max   0.9836 
_exptl_absorpt_process_details    'multi-scan' 
 
_exptl_special_details 
; 
 ? 
; 
 
_diffrn_ambient_temperature       100(2) 
_diffrn_radiation_wavelength      0.71073 
_diffrn_radiation_type            MoK\a 
_diffrn_radiation_source          'fine-focus sealed tube' 
_diffrn_radiation_monochromator   graphite 
_diffrn_measurement_device_type  'Bruker APEX-II CCD'
_diffrn_measurement_method       '\f and \w scans'
_diffrn_detector_area_resol_mean  ? 
_diffrn_reflns_number             16708 
_diffrn_reflns_av_R_equivalents   0.0227 
_diffrn_reflns_av_sigmaI/netI     0.0210 
_diffrn_reflns_limit_h_min        -11 
_diffrn_reflns_limit_h_max        10 
_diffrn_reflns_limit_k_min        -14 
_diffrn_reflns_limit_k_max        14 
_diffrn_reflns_limit_l_min        -25 
_diffrn_reflns_limit_l_max        26 
_diffrn_reflns_theta_min          2.19 
_diffrn_reflns_theta_max          30.08 
_reflns_number_total              4464 
_reflns_number_gt                 4261 
_reflns_threshold_expression      >2sigma(I) 

_computing_data_collection      'Bruker APEX2'
_computing_cell_refinement      'Bruker SAINT'
_computing_data_reduction       'Bruker SAINT' 
_computing_structure_solution   'SHELXS-97 (Sheldrick, 2008)'
_computing_structure_refinement 'SHELXL-97 (Sheldrick, 2008)'
_computing_molecular_graphics   'Bruker SHELXTL'
_computing_publication_material 'Bruker SHELXTL'
 
_refine_special_details 
; 
 Refinement of F^2^ against ALL reflections.  The weighted R-factor wR and 
 goodness of fit S are based on F^2^, conventional R-factors R are based 
 on F, with F set to zero for negative F^2^. The threshold expression of 
 F^2^ > 2sigma(F^2^) is used only for calculating R-factors(gt) etc. and is 
 not relevant to the choice of reflections for refinement.  R-factors based 
 on F^2^ are statistically about twice as large as those based on F, and R- 
 factors based on ALL data will be even larger. 
; 
 
_refine_ls_structure_factor_coef  Fsqd  
_refine_ls_matrix_type            full 
_refine_ls_weighting_scheme       calc  
_refine_ls_weighting_details 
 'calc w=1/[\s^2^(Fo^2^)+(0.0482P)^2^+0.1970P] where P=(Fo^2^+2Fc^2^)/3' 
_atom_sites_solution_primary      direct 
_atom_sites_solution_secondary    difmap 
_atom_sites_solution_hydrogens    geom 
_refine_ls_hydrogen_treatment     mixed 
_refine_ls_extinction_method      none 
_refine_ls_extinction_coef        ? 
_refine_ls_abs_structure_details 
 'Flack H D (1983), Acta Cryst. A39, 876-881' 
_refine_ls_abs_structure_Flack    0.3(6) 
_refine_ls_number_reflns          4464 
_refine_ls_number_parameters      207 
_refine_ls_number_restraints      3 
_refine_ls_R_factor_all           0.0324 
_refine_ls_R_factor_gt            0.0303 
_refine_ls_wR_factor_ref          0.0804 
_refine_ls_wR_factor_gt           0.0789 
_refine_ls_goodness_of_fit_ref    1.076 
_refine_ls_restrained_S_all       1.076 
_refine_ls_shift/su_max           0.001 
_refine_ls_shift/su_mean          0.000 
 
loop_ 
 _atom_site_label 
 _atom_site_type_symbol 
 _atom_site_fract_x 
 _atom_site_fract_y 
 _atom_site_fract_z 
 _atom_site_U_iso_or_equiv 
 _atom_site_adp_type 
 _atom_site_occupancy 
 _atom_site_symmetry_multiplicity 
 _atom_site_calc_flag 
 _atom_site_refinement_flags 
 _atom_site_disorder_assembly 
 _atom_site_disorder_group 
O5 O 0.77083(11) 1.29558(7) 0.05546(4) 0.02305(17) Uani 1 1 d . . . 
O1S O 0.64896(12) 0.51899(8) 0.12595(5) 0.02421(18) Uani 1 1 d D . . 
H1SB H 0.693(2) 0.4576(11) 0.1072(9) 0.036 Uiso 1 1 d D . . 
H1SA H 0.700(2) 0.5815(11) 0.1127(8) 0.036 Uiso 1 1 d D . . 
O13 O 0.80925(10) 0.74995(6) 0.09516(4) 0.01885(15) Uani 1 1 d . . . 
O2 O 0.49322(10) 1.02460(7) 0.23745(4) 0.01781(15) Uani 1 1 d . . . 
H2 H 0.4455 1.0175 0.2776 0.027 Uiso 1 1 calc R . . 
N1 N 0.81911(12) 0.88914(8) 0.23234(5) 0.01593(17) Uani 1 1 d . . . 
C5 C 0.75791(13) 1.18407(9) 0.04627(5) 0.01497(18) Uani 1 1 d . . . 
C17 C 0.74803(15) 0.77605(10) 0.26396(6) 0.0228(2) Uani 1 1 d . . . 
H17A H 0.7642 0.7062 0.2308 0.034 Uiso 1 1 calc R . . 
H17B H 0.6259 0.7879 0.2729 0.034 Uiso 1 1 calc R . . 
H17C H 0.8063 0.7582 0.3093 0.034 Uiso 1 1 calc R . . 
C9 C 1.00097(14) 0.87404(10) 0.21621(6) 0.0209(2) Uani 1 1 d . . . 
H9A H 1.0196 0.7920 0.1933 0.025 Uiso 1 1 calc R . . 
H9B H 1.0669 0.8759 0.2615 0.025 Uiso 1 1 calc R . . 
C10 C 1.06558(13) 0.97625(11) 0.16651(6) 0.0209(2) Uani 1 1 d . . . 
H10A H 1.1915 0.9702 0.1639 0.025 Uiso 1 1 calc R . . 
H10B H 1.0377 1.0577 0.1884 0.025 Uiso 1 1 calc R . . 
C11 C 0.99484(12) 0.97487(9) 0.08965(6) 0.01652(18) Uani 1 1 d . . . 
H11A H 1.0445 0.9017 0.0650 0.020 Uiso 1 1 calc R . . 
H11B H 1.0393 1.0497 0.0649 0.020 Uiso 1 1 calc R . . 
C12 C 0.80040(12) 0.97125(8) 0.07722(5) 0.01148(16) Uani 1 1 d . . . 
C7 C 0.76716(13) 0.97913(9) -0.00707(5) 0.01504(17) Uani 1 1 d . . . 
H7 H 0.8523 0.9271 -0.0335 0.018 Uiso 1 1 calc R . . 
C8 C 0.58373(14) 0.93464(10) -0.02397(6) 0.0195(2) Uani 1 1 d . . . 
H8A H 0.5340 0.9866 -0.0625 0.023 Uiso 1 1 calc R . . 
H8B H 0.5863 0.8473 -0.0408 0.023 Uiso 1 1 calc R . . 
C4 C 0.69616(12) 1.08878(8) 0.10152(5) 0.01100(16) Uani 1 1 d . . . 
C16 C 0.50250(12) 1.07135(9) 0.07893(5) 0.01414(17) Uani 1 1 d . . . 
H16A H 0.4290 1.0790 0.1219 0.017 Uiso 1 1 calc R . . 
H16B H 0.4699 1.1378 0.0448 0.017 Uiso 1 1 calc R . . 
C15 C 0.47371(12) 0.94459(9) 0.04407(5) 0.01666(19) Uani 1 1 d . . . 
H15 H 0.3504 0.9334 0.0319 0.020 Uiso 1 1 calc R . . 
C13 C 0.72370(12) 0.84558(8) 0.09628(5) 0.01318(17) Uani 1 1 d . . . 
C14 C 0.53156(12) 0.84391(9) 0.09738(6) 0.01602(18) Uani 1 1 d . . . 
H14A H 0.4886 0.8626 0.1462 0.019 Uiso 1 1 calc R . . 
H14B H 0.4882 0.7613 0.0826 0.019 Uiso 1 1 calc R . . 
C1 C 0.78497(14) 0.99810(9) 0.27794(5) 0.01819(19) Uani 1 1 d . . . 
H1A H 0.8929 1.0442 0.2855 0.022 Uiso 1 1 calc R . . 
H1B H 0.7442 0.9692 0.3254 0.022 Uiso 1 1 calc R . . 
C2 C 0.65330(13) 1.08588(9) 0.24607(5) 0.01550(18) Uani 1 1 d . . . 
H2A H 0.6351 1.1536 0.2821 0.019 Uiso 1 1 calc R . . 
C3 C 0.70883(13) 1.14963(8) 0.17605(5) 0.01352(17) Uani 1 1 d . . . 
H3A H 0.8300 1.1731 0.1826 0.016 Uiso 1 1 calc R . . 
H3B H 0.6437 1.2284 0.1732 0.016 Uiso 1 1 calc R . . 
C6 C 0.79523(15) 1.11787(9) -0.02369(5) 0.01749(19) Uani 1 1 d . . . 
H6A H 0.9142 1.1332 -0.0392 0.021 Uiso 1 1 calc R . . 
H6B H 0.7167 1.1463 -0.0620 0.021 Uiso 1 1 calc R . . 
 
loop_ 
 _atom_site_aniso_label 
 _atom_site_aniso_U_11 
 _atom_site_aniso_U_22 
 _atom_site_aniso_U_33 
 _atom_site_aniso_U_23 
 _atom_site_aniso_U_13 
 _atom_site_aniso_U_12 
O5 0.0365(5) 0.0111(3) 0.0215(4) 0.0009(3) 0.0104(3) -0.0011(3) 
O1S 0.0314(4) 0.0159(3) 0.0253(4) -0.0035(3) 0.0129(3) -0.0025(3) 
O13 0.0206(3) 0.0108(3) 0.0252(4) -0.0016(3) 0.0050(3) 0.0013(3) 
O2 0.0179(3) 0.0209(3) 0.0146(3) 0.0011(3) 0.0046(3) -0.0018(3) 
N1 0.0165(4) 0.0129(3) 0.0184(4) 0.0029(3) -0.0011(3) -0.0001(3) 
C5 0.0178(4) 0.0127(4) 0.0144(4) 0.0011(3) 0.0034(3) 0.0004(3) 
C17 0.0291(5) 0.0151(4) 0.0241(5) 0.0065(4) 0.0019(4) -0.0006(4) 
C9 0.0152(5) 0.0214(4) 0.0262(5) 0.0052(4) -0.0048(4) 0.0032(4) 
C10 0.0114(4) 0.0227(5) 0.0285(5) 0.0023(4) -0.0032(4) -0.0021(4) 
C11 0.0101(4) 0.0147(4) 0.0247(5) 0.0003(4) 0.0037(4) -0.0006(3) 
C12 0.0109(4) 0.0089(3) 0.0147(4) -0.0009(3) 0.0020(3) -0.0003(3) 
C7 0.0182(4) 0.0136(4) 0.0133(4) -0.0029(3) 0.0040(3) -0.0019(3) 
C8 0.0217(5) 0.0224(5) 0.0144(4) -0.0041(4) -0.0004(4) -0.0045(4) 
C4 0.0127(4) 0.0092(3) 0.0111(4) 0.0000(3) 0.0022(3) 0.0007(3) 
C16 0.0121(4) 0.0151(4) 0.0152(4) 0.0007(3) -0.0002(3) 0.0024(3) 
C15 0.0135(4) 0.0195(4) 0.0169(4) -0.0017(4) -0.0015(3) -0.0025(3) 
C13 0.0143(4) 0.0108(4) 0.0144(4) -0.0011(3) 0.0025(3) -0.0017(3) 
C14 0.0132(4) 0.0131(4) 0.0217(5) -0.0012(3) 0.0024(3) -0.0035(3) 
C1 0.0237(5) 0.0174(4) 0.0135(4) 0.0016(3) -0.0031(4) -0.0014(4) 
C2 0.0209(5) 0.0135(4) 0.0121(4) -0.0006(3) 0.0012(3) -0.0008(3) 
C3 0.0180(4) 0.0102(4) 0.0124(4) -0.0013(3) 0.0013(3) -0.0003(3) 
C6 0.0258(5) 0.0141(4) 0.0125(4) 0.0001(3) 0.0056(4) -0.0008(4) 
 
_geom_special_details 
; 
 All esds (except the esd in the dihedral angle between two l.s. planes) 
 are estimated using the full covariance matrix.  The cell esds are taken 
 into account individually in the estimation of esds in distances, angles 
 and torsion angles; correlations between esds in cell parameters are only 
 used when they are defined by crystal symmetry.  An approximate (isotropic) 
 treatment of cell esds is used for estimating esds involving l.s. planes. 
; 
 
loop_ 
 _geom_bond_atom_site_label_1 
 _geom_bond_atom_site_label_2 
 _geom_bond_distance 
 _geom_bond_site_symmetry_2 
 _geom_bond_publ_flag 
O5 C5 1.2147(12) . ? 
O1S H1SB 0.823(9) . ? 
O1S H1SA 0.821(9) . ? 
O13 C13 1.2272(12) . ? 
O2 C2 1.4258(13) . ? 
O2 H2 0.8400 . ? 
N1 C17 1.4609(13) . ? 
N1 C9 1.4655(14) . ? 
N1 C1 1.4712(13) . ? 
C5 C6 1.5134(13) . ? 
C5 C4 1.5305(13) . ? 
C17 H17A 0.9800 . ? 
C17 H17B 0.9800 . ? 
C17 H17C 0.9800 . ? 
C9 C10 1.5232(15) . ? 
C9 H9A 0.9900 . ? 
C9 H9B 0.9900 . ? 
C10 C11 1.5357(15) . ? 
C10 H10A 0.9900 . ? 
C10 H10B 0.9900 . ? 
C11 C12 1.5417(13) . ? 
C11 H11A 0.9900 . ? 
C11 H11B 0.9900 . ? 
C12 C13 1.5202(12) . ? 
C12 C4 1.5708(12) . ? 
C12 C7 1.5940(13) . ? 
C7 C6 1.5385(14) . ? 
C7 C8 1.5472(14) . ? 
C7 H7 1.0000 . ? 
C8 C15 1.5367(14) . ? 
C8 H8A 0.9900 . ? 
C8 H8B 0.9900 . ? 
C4 C3 1.5379(12) . ? 
C4 C16 1.5859(14) . ? 
C16 C15 1.5257(13) . ? 
C16 H16A 0.9900 . ? 
C16 H16B 0.9900 . ? 
C15 C14 1.5370(14) . ? 
C15 H15 1.0000 . ? 
C13 C14 1.5059(13) . ? 
C14 H14A 0.9900 . ? 
C14 H14B 0.9900 . ? 
C1 C2 1.5189(15) . ? 
C1 H1A 0.9900 . ? 
C1 H1B 0.9900 . ? 
C2 C3 1.5363(13) . ? 
C2 H2A 1.0000 . ? 
C3 H3A 0.9900 . ? 
C3 H3B 0.9900 . ? 
C6 H6A 0.9900 . ? 
C6 H6B 0.9900 . ? 
 
loop_ 
 _geom_angle_atom_site_label_1 
 _geom_angle_atom_site_label_2 
 _geom_angle_atom_site_label_3 
 _geom_angle 
 _geom_angle_site_symmetry_1 
 _geom_angle_site_symmetry_3 
 _geom_angle_publ_flag 
H1SB O1S H1SA 108.7(14) . . ? 
C2 O2 H2 109.5 . . ? 
C17 N1 C9 111.18(8) . . ? 
C17 N1 C1 111.09(8) . . ? 
C9 N1 C1 112.54(9) . . ? 
O5 C5 C6 124.68(9) . . ? 
O5 C5 C4 126.27(9) . . ? 
C6 C5 C4 109.02(8) . . ? 
N1 C17 H17A 109.5 . . ? 
N1 C17 H17B 109.5 . . ? 
H17A C17 H17B 109.5 . . ? 
N1 C17 H17C 109.5 . . ? 
H17A C17 H17C 109.5 . . ? 
H17B C17 H17C 109.5 . . ? 
N1 C9 C10 111.60(8) . . ? 
N1 C9 H9A 109.3 . . ? 
C10 C9 H9A 109.3 . . ? 
N1 C9 H9B 109.3 . . ? 
C10 C9 H9B 109.3 . . ? 
H9A C9 H9B 108.0 . . ? 
C9 C10 C11 116.10(9) . . ? 
C9 C10 H10A 108.3 . . ? 
C11 C10 H10A 108.3 . . ? 
C9 C10 H10B 108.3 . . ? 
C11 C10 H10B 108.3 . . ? 
H10A C10 H10B 107.4 . . ? 
C10 C11 C12 119.81(8) . . ? 
C10 C11 H11A 107.4 . . ? 
C12 C11 H11A 107.4 . . ? 
C10 C11 H11B 107.4 . . ? 
C12 C11 H11B 107.4 . . ? 
H11A C11 H11B 106.9 . . ? 
C13 C12 C11 112.21(8) . . ? 
C13 C12 C4 116.19(7) . . ? 
C11 C12 C4 116.77(7) . . ? 
C13 C12 C7 102.28(7) . . ? 
C11 C12 C7 107.95(8) . . ? 
C4 C12 C7 99.00(7) . . ? 
C6 C7 C8 113.04(9) . . ? 
C6 C7 C12 103.08(7) . . ? 
C8 C7 C12 109.63(8) . . ? 
C6 C7 H7 110.3 . . ? 
C8 C7 H7 110.3 . . ? 
C12 C7 H7 110.3 . . ? 
C15 C8 C7 109.38(8) . . ? 
C15 C8 H8A 109.8 . . ? 
C7 C8 H8A 109.8 . . ? 
C15 C8 H8B 109.8 . . ? 
C7 C8 H8B 109.8 . . ? 
H8A C8 H8B 108.2 . . ? 
C5 C4 C3 107.60(7) . . ? 
C5 C4 C12 100.34(7) . . ? 
C3 C4 C12 124.65(8) . . ? 
C5 C4 C16 101.72(7) . . ? 
C3 C4 C16 110.59(8) . . ? 
C12 C4 C16 109.03(7) . . ? 
C15 C16 C4 111.10(7) . . ? 
C15 C16 H16A 109.4 . . ? 
C4 C16 H16A 109.4 . . ? 
C15 C16 H16B 109.4 . . ? 
C4 C16 H16B 109.4 . . ? 
H16A C16 H16B 108.0 . . ? 
C16 C15 C8 109.28(8) . . ? 
C16 C15 C14 108.04(8) . . ? 
C8 C15 C14 108.57(8) . . ? 
C16 C15 H15 110.3 . . ? 
C8 C15 H15 110.3 . . ? 
C14 C15 H15 110.3 . . ? 
O13 C13 C14 122.44(9) . . ? 
O13 C13 C12 121.60(9) . . ? 
C14 C13 C12 114.15(8) . . ? 
C13 C14 C15 106.12(8) . . ? 
C13 C14 H14A 110.5 . . ? 
C15 C14 H14A 110.5 . . ? 
C13 C14 H14B 110.5 . . ? 
C15 C14 H14B 110.5 . . ? 
H14A C14 H14B 108.7 . . ? 
N1 C1 C2 113.08(8) . . ? 
N1 C1 H1A 109.0 . . ? 
C2 C1 H1A 109.0 . . ? 
N1 C1 H1B 109.0 . . ? 
C2 C1 H1B 109.0 . . ? 
H1A C1 H1B 107.8 . . ? 
O2 C2 C1 110.78(8) . . ? 
O2 C2 C3 111.08(8) . . ? 
C1 C2 C3 114.61(9) . . ? 
O2 C2 H2A 106.6 . . ? 
C1 C2 H2A 106.6 . . ? 
C3 C2 H2A 106.6 . . ? 
C2 C3 C4 123.97(8) . . ? 
C2 C3 H3A 106.3 . . ? 
C4 C3 H3A 106.3 . . ? 
C2 C3 H3B 106.3 . . ? 
C4 C3 H3B 106.3 . . ? 
H3A C3 H3B 106.4 . . ? 
C5 C6 C7 104.74(7) . . ? 
C5 C6 H6A 110.8 . . ? 
C7 C6 H6A 110.8 . . ? 
C5 C6 H6B 110.8 . . ? 
C7 C6 H6B 110.8 . . ? 
H6A C6 H6B 108.9 . . ? 
 
loop_ 
 _geom_torsion_atom_site_label_1 
 _geom_torsion_atom_site_label_2 
 _geom_torsion_atom_site_label_3 
 _geom_torsion_atom_site_label_4 
 _geom_torsion 
 _geom_torsion_site_symmetry_1 
 _geom_torsion_site_symmetry_2 
 _geom_torsion_site_symmetry_3 
 _geom_torsion_site_symmetry_4 
 _geom_torsion_publ_flag 
C17 N1 C9 C10 165.33(9) . . . . ? 
C1 N1 C9 C10 -69.31(11) . . . . ? 
N1 C9 C10 C11 -67.41(12) . . . . ? 
C9 C10 C11 C12 52.53(13) . . . . ? 
C10 C11 C12 C13 -71.53(11) . . . . ? 
C10 C11 C12 C4 66.18(11) . . . . ? 
C10 C11 C12 C7 176.52(8) . . . . ? 
C13 C12 C7 C6 164.30(8) . . . . ? 
C11 C12 C7 C6 -77.20(9) . . . . ? 
C4 C12 C7 C6 44.84(9) . . . . ? 
C13 C12 C7 C8 43.67(9) . . . . ? 
C11 C12 C7 C8 162.17(8) . . . . ? 
C4 C12 C7 C8 -75.78(9) . . . . ? 
C6 C7 C8 C15 -93.23(10) . . . . ? 
C12 C7 C8 C15 21.15(11) . . . . ? 
O5 C5 C4 C3 -18.00(14) . . . . ? 
C6 C5 C4 C3 164.02(8) . . . . ? 
O5 C5 C4 C12 -149.62(11) . . . . ? 
C6 C5 C4 C12 32.40(10) . . . . ? 
O5 C5 C4 C16 98.27(12) . . . . ? 
C6 C5 C4 C16 -79.71(9) . . . . ? 
C13 C12 C4 C5 -154.57(8) . . . . ? 
C11 C12 C4 C5 69.39(10) . . . . ? 
C7 C12 C4 C5 -46.03(8) . . . . ? 
C13 C12 C4 C3 85.45(11) . . . . ? 
C11 C12 C4 C3 -50.60(12) . . . . ? 
C7 C12 C4 C3 -166.02(8) . . . . ? 
C13 C12 C4 C16 -48.23(10) . . . . ? 
C11 C12 C4 C16 175.73(8) . . . . ? 
C7 C12 C4 C16 60.31(8) . . . . ? 
C5 C4 C16 C15 108.15(8) . . . . ? 
C3 C4 C16 C15 -137.78(8) . . . . ? 
C12 C4 C16 C15 2.76(10) . . . . ? 
C4 C16 C15 C8 -60.88(10) . . . . ? 
C4 C16 C15 C14 57.08(10) . . . . ? 
C7 C8 C15 C16 46.81(11) . . . . ? 
C7 C8 C15 C14 -70.82(10) . . . . ? 
C11 C12 C13 O13 -25.06(13) . . . . ? 
C4 C12 C13 O13 -163.04(9) . . . . ? 
C7 C12 C13 O13 90.38(11) . . . . ? 
C11 C12 C13 C14 169.93(8) . . . . ? 
C4 C12 C13 C14 31.95(12) . . . . ? 
C7 C12 C13 C14 -74.63(9) . . . . ? 
O13 C13 C14 C15 -136.76(10) . . . . ? 
C12 C13 C14 C15 28.11(11) . . . . ? 
C16 C15 C14 C13 -74.85(10) . . . . ? 
C8 C15 C14 C13 43.57(10) . . . . ? 
C17 N1 C1 C2 -108.63(10) . . . . ? 
C9 N1 C1 C2 125.96(9) . . . . ? 
N1 C1 C2 O2 61.41(11) . . . . ? 
N1 C1 C2 C3 -65.24(11) . . . . ? 
O2 C2 C3 C4 -44.11(13) . . . . ? 
C1 C2 C3 C4 82.39(12) . . . . ? 
C5 C4 C3 C2 177.97(9) . . . . ? 
C12 C4 C3 C2 -65.40(13) . . . . ? 
C16 C4 C3 C2 67.68(11) . . . . ? 
O5 C5 C6 C7 177.83(10) . . . . ? 
C4 C5 C6 C7 -4.16(11) . . . . ? 
C8 C7 C6 C5 92.66(10) . . . . ? 
C12 C7 C6 C5 -25.60(10) . . . . ? 
 
loop_ 
 _geom_hbond_atom_site_label_D 
 _geom_hbond_atom_site_label_H 
 _geom_hbond_atom_site_label_A 
 _geom_hbond_distance_DH 
 _geom_hbond_distance_HA 
 _geom_hbond_distance_DA 
 _geom_hbond_angle_DHA 
 _geom_hbond_site_symmetry_A 
O1S H1SB O5  0.823(9) 2.081(9) 2.8983(11) 172.0(17) 1_545 
O1S H1SA O13  0.821(9) 2.028(9) 2.8402(11) 170.0(16) . 
O2 H2 O1S  0.84 1.94 2.7787(11) 172.9 3_655 
 
_diffrn_measured_fraction_theta_max    0.979 
_diffrn_reflns_theta_full              30.08 
_diffrn_measured_fraction_theta_full   0.979 
_refine_diff_density_max    0.284 
_refine_diff_density_min   -0.243 
_refine_diff_density_rms    0.057 
